# Supplementary material for: One-pot synthesis of nanosheet-assembled hierarchical MoSe2/CoSe2 microcages for the enhanced performance of electrocatalytic hydrogen evolution
Source: Royal Society of Chemistry journal article supplement (doi:10.1039/c5ra21638a), 2015-12-15
Supplement: c5ra21638a1.pdf [file c5ra21638a1.pdf]

## *Supporting Information for*

One-pot synthesis of Nanosheet-assembled hierarchical MoSe<sub>2</sub>/CoSe<sub>2</sub>

microcages for the enhanced performance of electrocatalytic hydrogen evolution

C. H. Mu,<sup>a§</sup> H. X. Qi,<sup>a,b§</sup> Y. Q. Song,<sup>\*a</sup> Z. P. Liu,<sup>\*b</sup> L. X. Ji,<sup>b</sup> J. G. Deng<sup>b</sup>, Y. B. Liao,<sup>a</sup> and F. Scarpa<sup>c</sup>

- 
- a.* School of Energy Science and Engineering, University of Electronic Science and Technology of China, Chengdu 610054, China. E-mail: yuanqiangsong@uestc.edu.cn  
*b.* Institute of Chemical Materials, China Academy of Engineering Physics (CAEP), Mianyang 621900, China. E-mail: zhongpingliu0816@gmail.com  
*c.* Bristol Centre for Nanoscience and Quantum Information, University of Bristol, BS8 1TR Bristol, UK

<sup>§</sup>These authors contribute equally.

### **Table of Contents**

S1. XPS spectra of MC11 composite, (a) full spectrum, (b) Mo 3d spectrum, (c) Co 2p spectrum, and (d) Se 3d spectrum.

S2. EDX spectrum of MC11 composite, showing an atomic ratio of Mo: Co: Se very close to 1: 1: 2.

S3. EDX mapping images of M11, which show a homogeneous distribution of selenium, molybdenum and cobalt throughout the microcage.

S4. Tafel plots of the  $\text{MoSe}_2/\text{CoSe}_2$  composite including MC11, MC31 and MC13, respectively.

S5. Nyquist plots of the  $\text{MoSe}_2/\text{CoSe}_2$  composite including MC11, MC31 and MC13, respectively. The inset shows the fitted results of the partial circle using simplified Randles equivalent circuit.

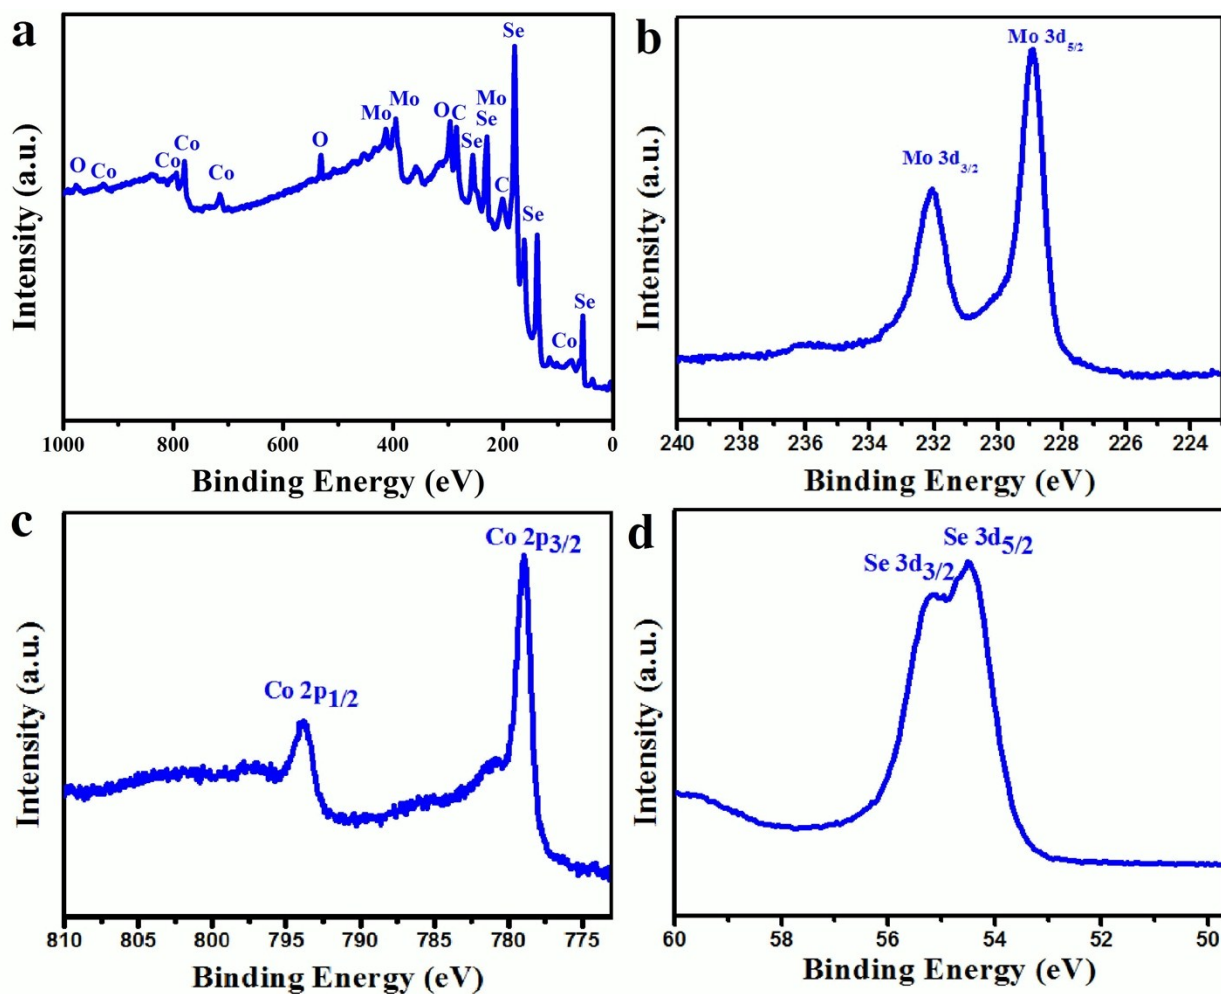

Figure S1.

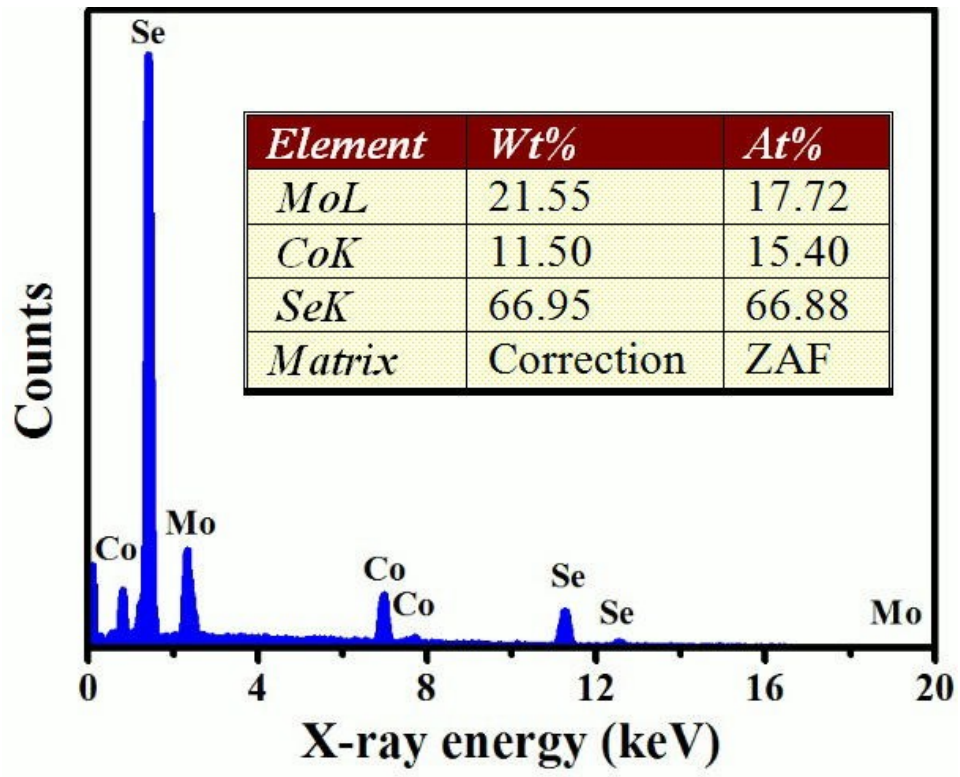

Figure S2.

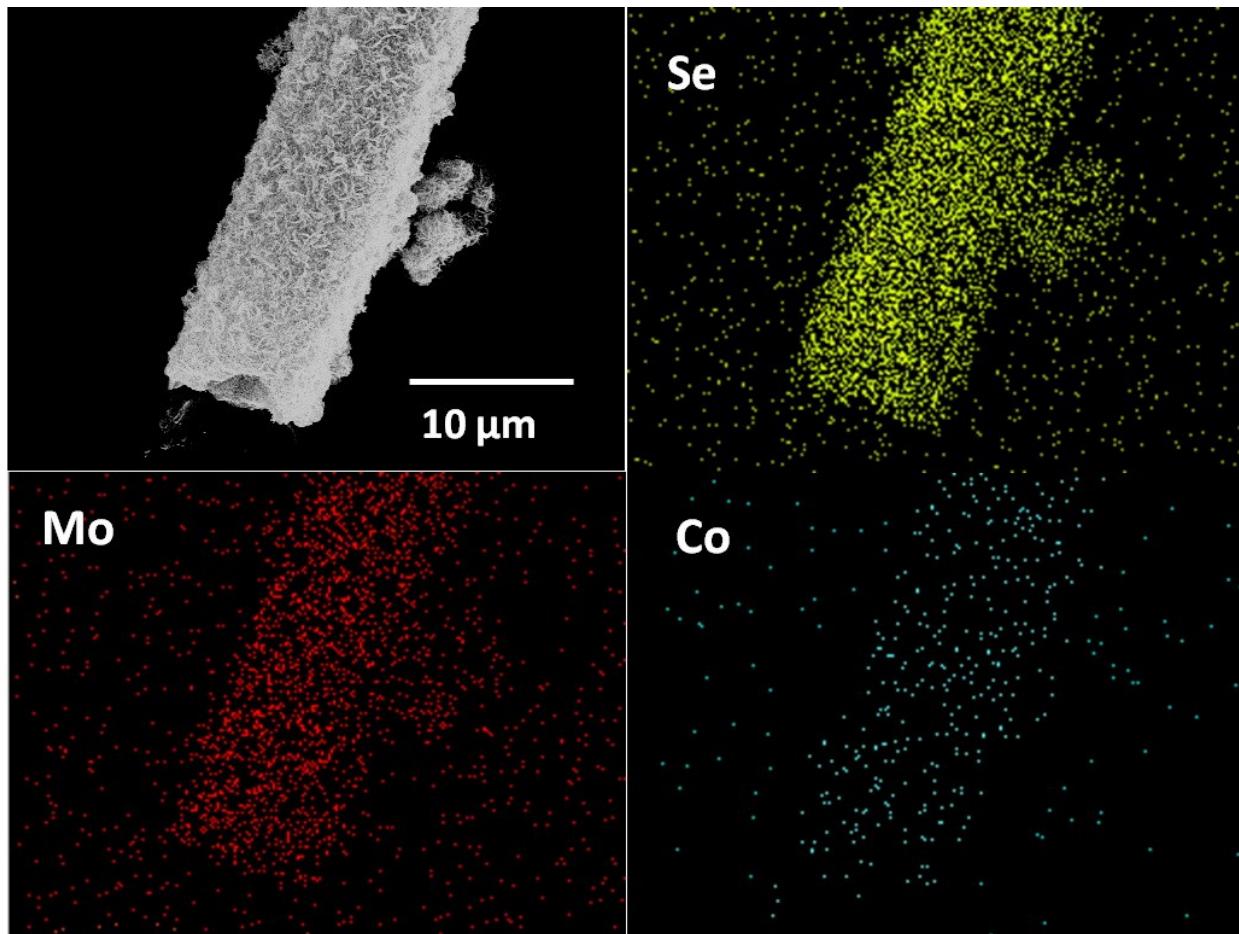

Figure S3.

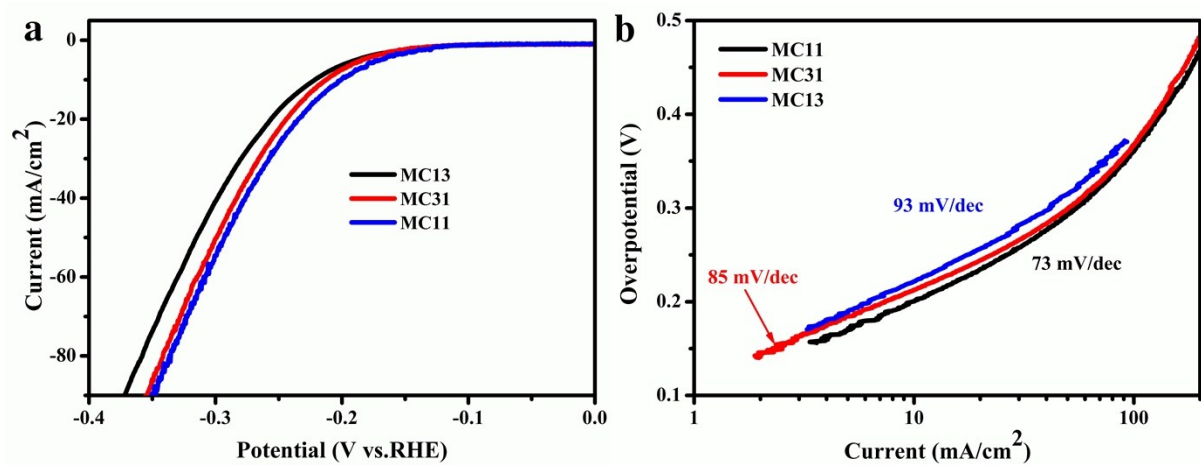

Figure S4.

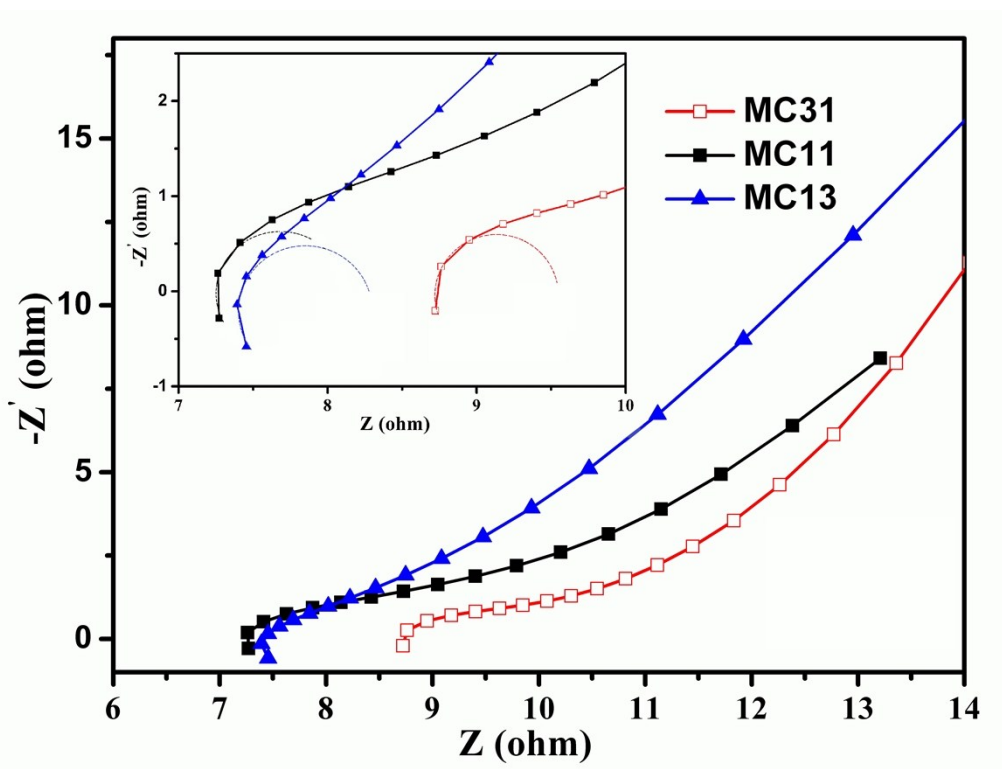

Figure S5.
